# Supplementary material for: Alternating Hemiplegia of Childhood-Related Neural and Behavioural Phenotypes in Na+,K+-ATPase α3 Missense Mutant Mice
Source: PubMed Central journal article supplement (PMC3603922; doi:10.1371/journal.pone.0060141), 2013-03-20
Supplement: pone.0060141.s001.pdf [file pone.0060141.s001.pdf]

# Supplementary Figure 1

A

|                     |     |                                                                        |     |
|---------------------|-----|------------------------------------------------------------------------|-----|
| <b>Homo sapiens</b> | 751 | GVEEGRLIFDNLKKSIAAYTLTSNIPEITPFLLFIMANIPLPLGTITILCIDLGTDMPAISLAYEAAESD | 820 |
| <b>Homo sapiens</b> | 751 | GVEEGRLIFDNLKKSIAAYTLTSNIPEITPFLLFIMANIPLPLGTITILCIDLGTDMPAISLAYEAAESD | 820 |
| <b>Mus musculus</b> | 751 | GVEEGRLIFDNLKKSIAAYTLTSNIPEITPFLLFIMANIPLPLGTITILCIDLGTDMPAISLAYEAAESD | 820 |

|         |                |
|---------|----------------|
| G755C/S | AHC            |
| R756H   | RDP (infant)   |
| I758S   | RDP            |
| S772R   | AHC            |
| N773I/S | AHC            |
| F780L   | RDP            |
| D801N   | AHC            |
| D801Y   | RDP            |
| M806R   | AHC            |
| I810S   | AHC            |
| I810N   | <i>Myshkin</i> |
| S811P   | AHC            |
| E815K   | AHC            |

B

Cytoplasm

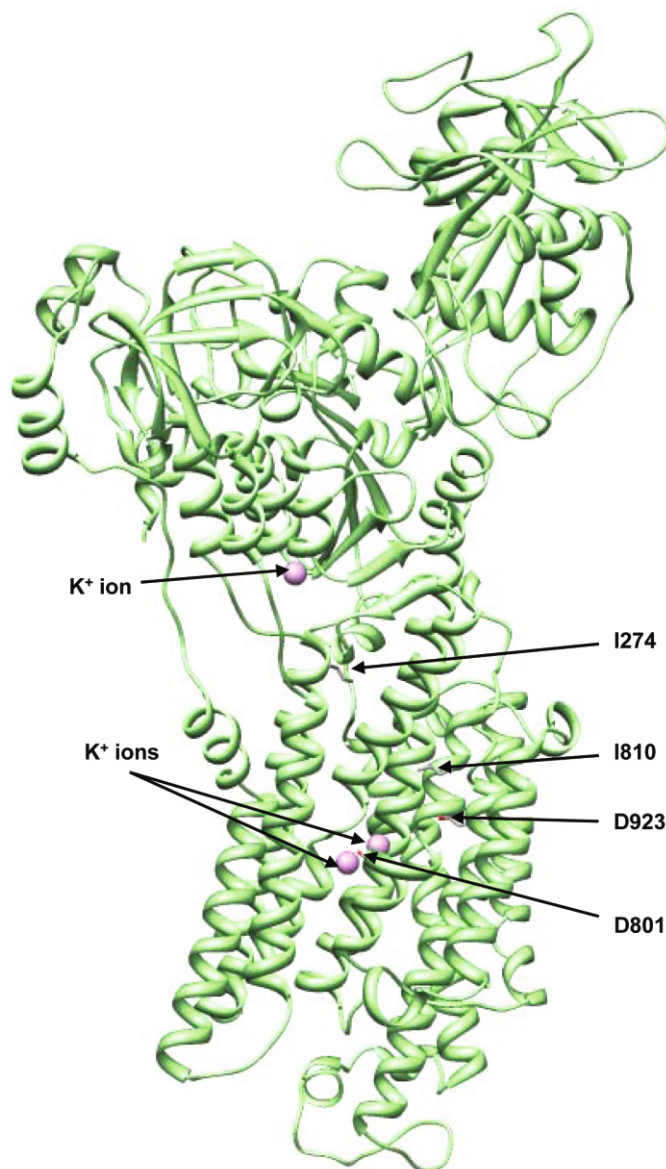

Lumen
