# Supplementary material for: Alternating Hemiplegia of Childhood-Related Neural and Behavioural Phenotypes in Na+,K+-ATPase α3 Missense Mutant Mice
Source: PubMed Central journal article supplement (PMC3603922; doi:10.1371/journal.pone.0060141), 2013-03-20

## Supplementary Figure 2

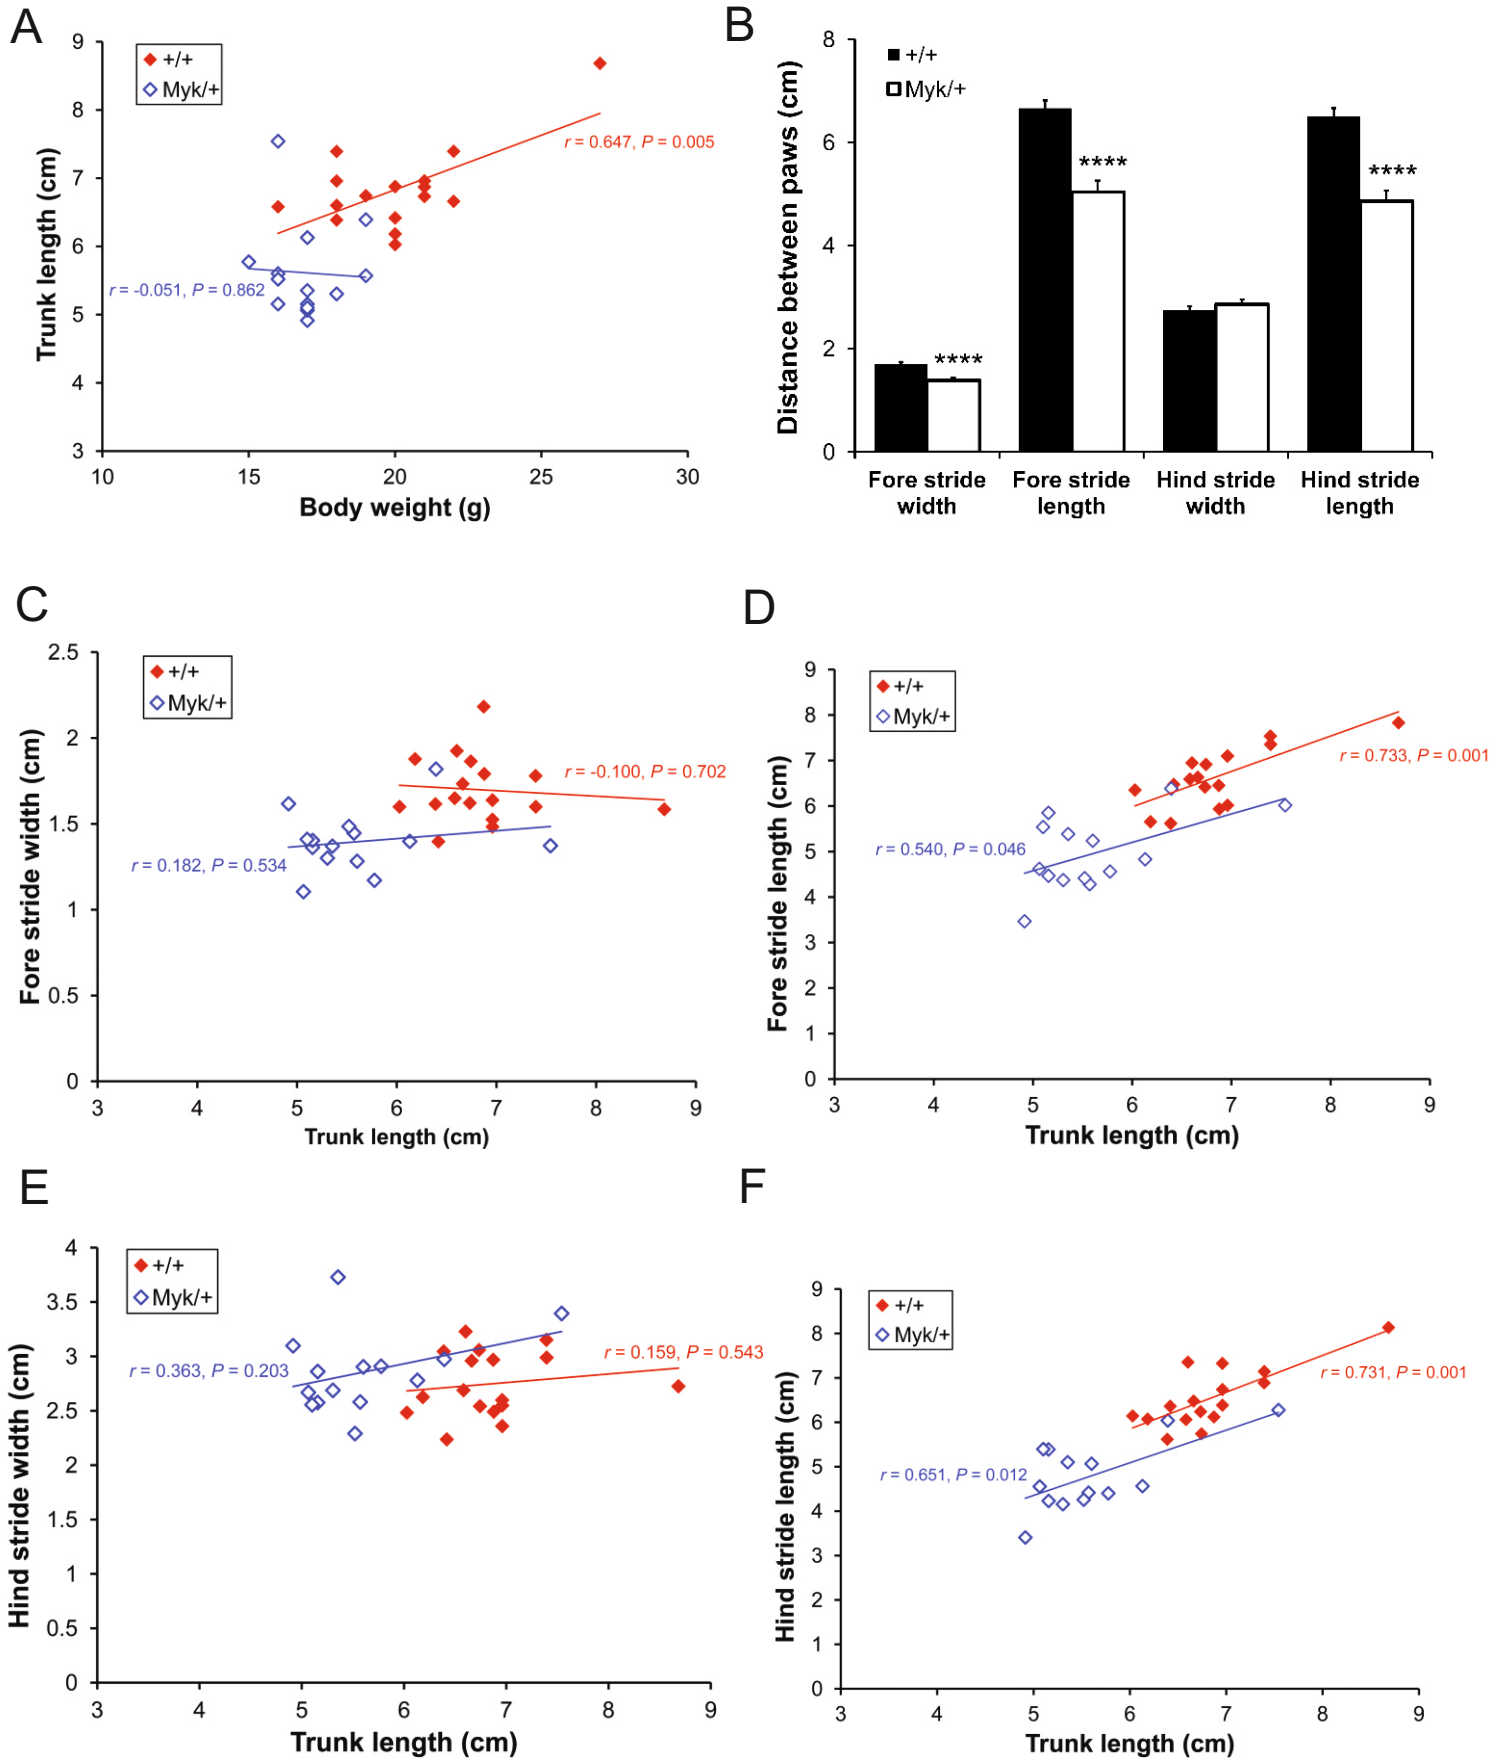

Supplement: pone.0060141.s002.pdf [file pone.0060141.s002.pdf]
