# Supplementary material for: Alternating Hemiplegia of Childhood-Related Neural and Behavioural Phenotypes in Na+,K+-ATPase α3 Missense Mutant Mice
Source: PubMed Central journal article supplement (PMC3603922; doi:10.1371/journal.pone.0060141), 2013-03-20

# Supplementary Figure 3

**A**

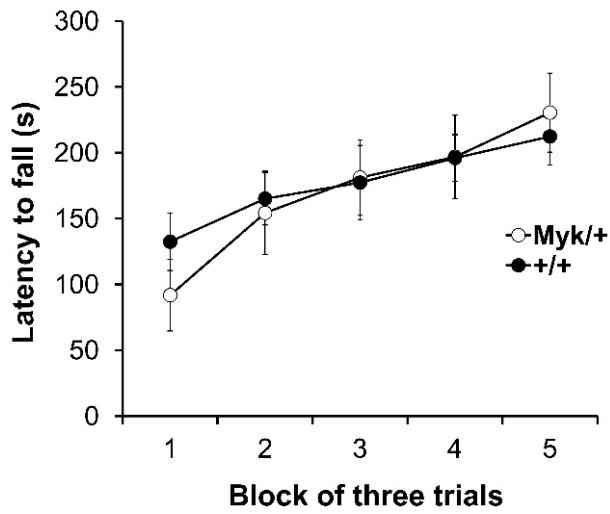

**B**

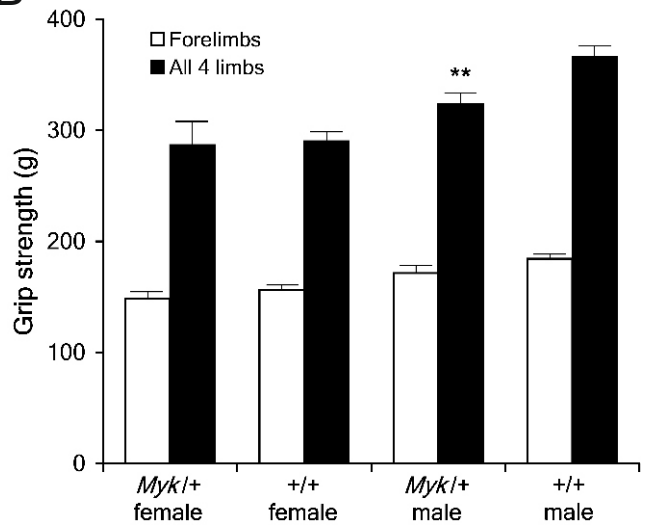

**C**

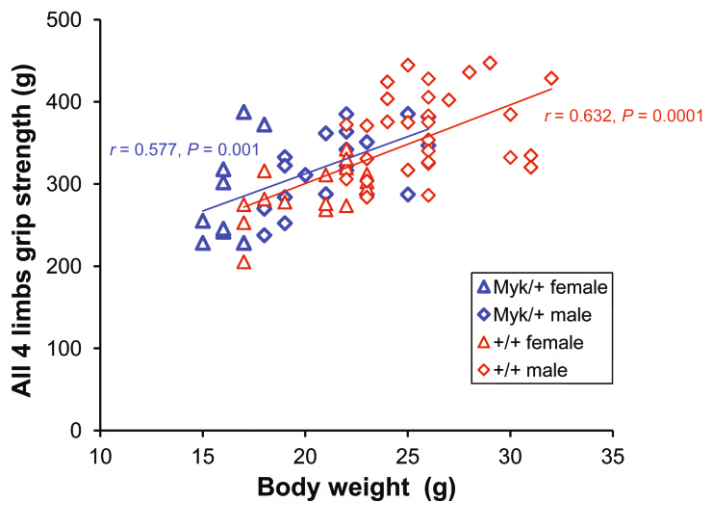

**D**

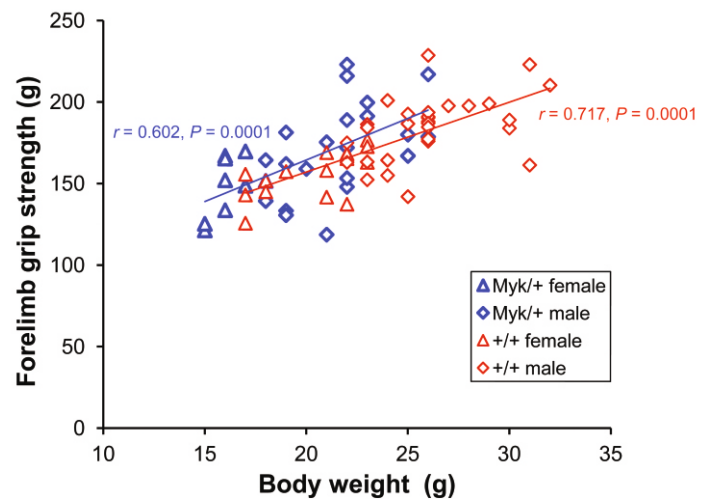

**E**

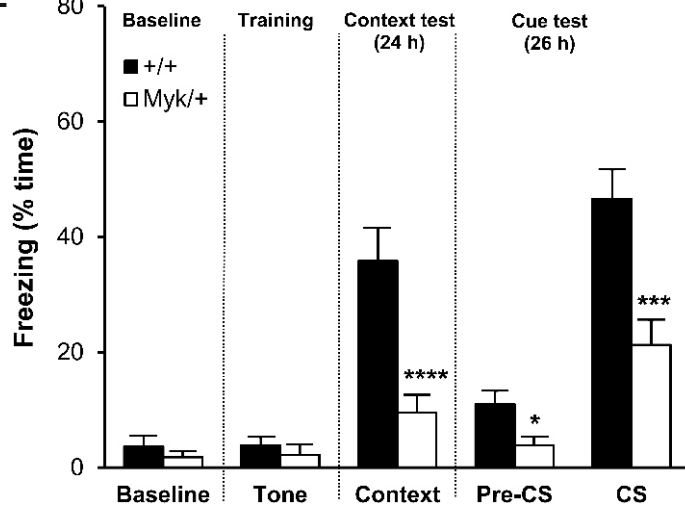

**F**

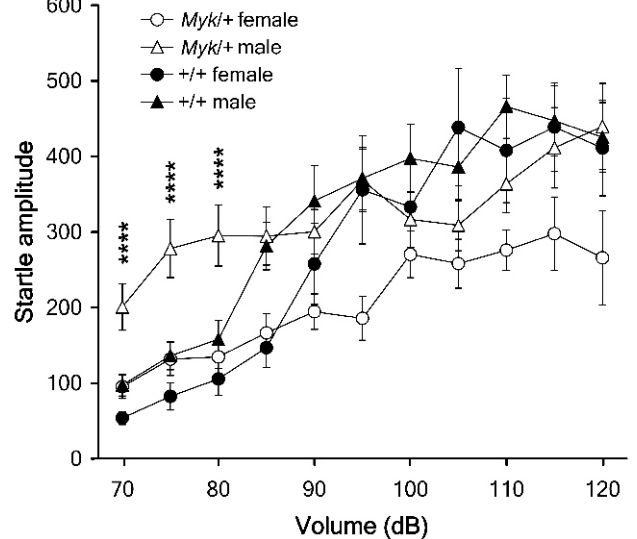

Supplement: pone.0060141.s003.pdf [file pone.0060141.s003.pdf]
