# Supplementary material for: Alternating Hemiplegia of Childhood-Related Neural and Behavioural Phenotypes in Na+,K+-ATPase α3 Missense Mutant Mice
Source: PubMed Central journal article supplement (PMC3603922; doi:10.1371/journal.pone.0060141), 2013-03-20
Supplement: pone.0060141.s005.pdf [file pone.0060141.s005.pdf]

**Supplementary Table 1.** Full data for overt cerebral metabolism.

| Brain Region                                               | Wild-type (+/+) |               | <i>Myshkin</i> ( <i>Myk</i> /+) |               |
|------------------------------------------------------------|-----------------|---------------|---------------------------------|---------------|
|                                                            | mean            | SEM           | mean                            | SEM           |
| <i>Cortex</i>                                              |                 |               |                                 |               |
| <b>Frontal (FCTX)</b>                                      | <b>0.85</b>     | ± <b>0.05</b> | <b>0.66*</b>                    | ± <b>0.04</b> |
| <b>Caudal Motor (CMCTX)</b>                                | <b>1.15</b>     | ± <b>0.06</b> | <b>0.95**</b>                   | ± <b>0.02</b> |
| Rostral Motor (RMCTX)                                      | 1.06            | ± 0.08        | 0.98                            | ± 0.02        |
| Somatosensory (SSCTX)                                      | 1.12            | ± 0.09        | 0.96                            | ± 0.01        |
| Entorhinal (EC)                                            | 0.71            | ± 0.08        | 0.59                            | ± 0.02        |
| Dorsolateral Entorhinal (DLECTX)                           | 0.89            | ± 0.11        | 0.88                            | ± 0.10        |
| <i>Thalamus</i>                                            |                 |               |                                 |               |
| <b>Ventral Anterior Nucleus (VAthal)</b>                   | <b>1.21</b>     | ± <b>0.09</b> | <b>0.99*</b>                    | ± <b>0.02</b> |
| Ventral Anterior Nucleus (VAthal)                          | 1.12            | ± 0.09        | 0.97                            | ± 0.01        |
| Ventral Posterolateral Nucleus (VPLthal)                   | 1.34            | ± 0.08        | 1.18                            | ± 0.03        |
| <b>Ventral Posteromedial Nucleus (VPMthal)</b>             | <b>1.63</b>     | ± <b>0.07</b> | <b>1.27***</b>                  | ± <b>0.03</b> |
| <b>Ventromedial Nucleus (VMthal)</b>                       | <b>1.64</b>     | ± <b>0.12</b> | <b>1.33**</b>                   | ± <b>0.02</b> |
| <i>Basal Ganglia</i>                                       |                 |               |                                 |               |
| Rostral Ventromedial Striatum (RVMStr)                     | 1.01            | ± 0.08        | 1.01                            | ± 0.02        |
| Rostral Dorsolateral Striatum (RDLStr)                     | 1.19            | ± 0.09        | 1.18                            | ± 0.02        |
| Rostral Dorsomedial Striatum (RDMStr)                      | 1.00            | ± 0.08        | 1.08                            | ± 0.04        |
| Rostral Ventrolateral Striatum (RVLStr)                    | 1.16            | ± 0.07        | 1.07                            | ± 0.02        |
| Caudal Centromedial Striatum (CCMStr)                      | 1.22            | ± 0.08        | 1.09                            | ± 0.03        |
| Caudal Dorsolateral Striatum (CDLStr)                      | 1.17            | ± 0.05        | 1.05                            | ± 0.03        |
| Caudal Dorsomedial Striatum (CDMStr)                       | 1.06            | ± 0.07        | 0.94                            | ± 0.03        |
| Caudal Ventrolateral Striatum (CVLStr)                     | 1.22            | ± 0.06        | 1.14                            | ± 0.02        |
| Globus Pallidus (GP)                                       | 0.89            | ± 0.05        | 0.79                            | ± 0.03        |
| Substantia Nigra pars Reticulata (SNR)                     | 0.73            | ± 0.06        | 0.67                            | ± 0.04        |
| <i>Hippocampus</i>                                         |                 |               |                                 |               |
| CA1                                                        | 0.75            | ± 0.08        | 0.64                            | ± 0.02        |
| CA3                                                        | 0.65            | ± 0.02        | 0.75                            | ± 0.04        |
| <i>Auditory</i>                                            |                 |               |                                 |               |
| Auditory (AudC)                                            | 0.96            | ± 0.04        | 0.88                            | ± 0.02        |
| Dorsal Cortex of the Inferior Colliculus (DCIC)            | 1.44            | ± 0.27        | 0.93                            | ± 0.07        |
| External Cortex of the Inferior Colliculus (ECIC)          | 1.88            | ± 0.24        | 1.99                            | ± 0.19        |
| Medial Geniculate Nucleus (MG)                             | 0.80            | ± 0.07        | 0.90                            | ± 0.02        |
| Olivary Body (OB)                                          | 0.89            | ± 0.08        | 0.88                            | ± 0.07        |
| <i>Visual</i>                                              |                 |               |                                 |               |
| Dorsolateral Geniculate (DLG)                              | 0.83            | ± 0.04        | 0.74                            | ± 0.01        |
| Superior Colliculus (SupC)                                 | 0.91            | ± 0.06        | 0.97                            | ± 0.03        |
| Superficial Grey Layer of the Superior Colliculus (SGSupC) | 0.95            | ± 0.14        | 1.12                            | ± 0.05        |
| <i>Neuromodulatory</i>                                     |                 |               |                                 |               |
| Median Raphe (MR)                                          | 1.43            | ± 0.14        | 1.57                            | ± 0.07        |
| Locus Coeruleus (LC)                                       | 0.78            | ± 0.08        | 0.82                            | ± 0.03        |
| <i>Periaqueductal Grey</i>                                 |                 |               |                                 |               |
| Caudal PAG (CPAG)                                          | 0.57            | ± 0.11        | 0.80                            | ± 0.04        |
| <b>Dorsomedial PAG (DMPAG)</b>                             | <b>0.57</b>     | ± <b>0.08</b> | <b>0.83**</b>                   | ± <b>0.02</b> |
| <b>Rostral PAG (RPAG)</b>                                  | <b>0.42</b>     | ± <b>0.10</b> | <b>0.73*</b>                    | ± <b>0.09</b> |
| <i>Cerebellum</i>                                          |                 |               |                                 |               |
| Superior Cerebellar Peduncle (SupCPed)                     | 0.96            | ± 0.09        | 0.75                            | ± 0.03        |
| Paramedian Lobule (PML)                                    | 0.95            | ± 0.04        | 0.96                            | ± 0.17        |
| Deep Cerebellar Nuclei (DCN)                               | 0.98            | ± 0.06        | 0.98                            | ± 0.10        |
| <i>Pons</i>                                                |                 |               |                                 |               |

|                   |                                         |      |   |      |      |   |      |
|-------------------|-----------------------------------------|------|---|------|------|---|------|
|                   | Gigantocellular Reticular Nucleus (GRt) | 0.86 | ± | 0.09 | 0.88 | ± | 0.06 |
|                   | Caudal Pontine Reticular Nucleus (CPRt) | 1.16 | ± | 0.09 | 1.35 | ± | 0.05 |
|                   | Pontine Reticular Formation (PRF)       | 0.82 | ± | 0.06 | 0.88 | ± | 0.05 |
| <i>Multimodal</i> |                                         |      |   |      |      |   |      |
|                   | Red Nucleus Parvocellular (RNPv)        | 1.02 | ± | 0.07 | 1.10 | ± | 0.03 |
|                   | Red Nucleus Magnocellular (RNMn)        | 1.08 | ± | 0.04 | 1.09 | ± | 0.04 |
|                   | Medial Amygdala (MeA)                   | 0.82 | ± | 0.08 | 0.87 | ± | 0.04 |
|                   | Medial Vestibular nucleus (MVN)         | 1.09 | ± | 0.13 | 1.26 | ± | 0.09 |

Bold denotes regions showing significantly different overt cerebral metabolism in *Myk*<sup>+/+</sup> as compared to *+/+* mice. \*denotes  $P < 0.05$ , \*\*denotes  $P < 0.01$  and \*\*\*denotes  $P < 0.001$  significant difference from wild-type control (Welch's *t*-test).
