# Supplementary material for: Alternating Hemiplegia of Childhood-Related Neural and Behavioural Phenotypes in Na+,K+-ATPase α3 Missense Mutant Mice
Source: PubMed Central journal article supplement (PMC3603922; doi:10.1371/journal.pone.0060141), 2013-03-20
Supplement: pone.0060141.s007.pdf [file pone.0060141.s007.pdf]

**Supplementary Table 3.** Full data for ventral anterior thalamus (VAthal) functional connectivity.

| Brain Region                                               | Wild-type (+/+) |               | <i>Myshkin</i> ( <i>Myk</i> /+) |               |
|------------------------------------------------------------|-----------------|---------------|---------------------------------|---------------|
|                                                            | mean            | SEM           | mean                            | SEM           |
| Caudal Motor (CMCTX)                                       | 0.46            | ± 0.04        | 0.48                            | ± 0.06        |
| Rostral Motor (RMCTX)                                      | <b>1.50</b>     | ± <b>0.03</b> | 0.42*                           | ± 0.09        |
| Frontal Cortex (FCTX)                                      | <b>1.28</b>     | ± <b>0.04</b> | 0.39*                           | ± 0.05        |
| Rostral Ventromedial Striatum (RVMStr)                     | <b>1.39</b>     | ± <b>0.03</b> | <b>0.90</b>                     | ± <b>0.09</b> |
| Rostral Dorsolateral Striatum (RDLStr)                     | <b>1.42</b>     | ± <b>0.02</b> | <b>1.52</b>                     | ± <b>0.04</b> |
| Rostral Dorsomedial Striatum (RDMStr)                      | <b>1.43</b>     | ± <b>0.02</b> | <b>1.47</b>                     | ± <b>0.05</b> |
| Rostral Ventrolateral Striatum (RVLStr)                    | <b>0.99</b>     | ± <b>0.08</b> | <b>1.44</b>                     | ± <b>0.07</b> |
| Caudal Centromedial Striatum (CCMStr)                      | <b>1.33</b>     | ± <b>0.03</b> | <b>0.85</b>                     | ± <b>0.06</b> |
| Caudal Dorsolateral Striatum (CDLStr)                      | 0.50            | ± 0.05        | 0.28                            | ± 0.06        |
| Caudal Dorsomedial Striatum (CDMStr)                       | <b>1.01</b>     | ± <b>0.07</b> | 0.26*                           | ± 0.07        |
| Caudal Ventrolateral Striatum (CVLStr)                     | <b>0.82</b>     | ± <b>0.09</b> | 0.67                            | ± 0.08        |
| Globus Pallidus (GP)                                       | <b>0.99</b>     | ± <b>0.08</b> | 0.31*                           | ± 0.08        |
| Olivary Body (OB)                                          | 0.36            | ± 0.06        | 0.44                            | ± 0.05        |
| Auditory (AudC)                                            | 0.47            | ± 0.09        | <b>1.01</b>                     | ± <b>0.05</b> |
| Substantia Nigra pars Reticulata (SNR)                     | 0.33            | ± 0.03        | 0.46                            | ± 0.09        |
| CA3                                                        | 0.45            | ± 0.08        | <b>0.84</b>                     | ± <b>0.07</b> |
| Somatosensory (SSCTX)                                      | <b>1.33</b>     | ± <b>0.03</b> | 0.30*                           | ± 0.07        |
| Ventrolateral Nucleus (VLthal)                             | <b>1.69</b>     | ± <b>0.04</b> | <b>1.75</b>                     | ± <b>0.05</b> |
| Dorsolateral Geniculate (DLG)                              | 0.42            | ± 0.06        | 0.82                            | ± 0.13        |
| CA1                                                        | <b>0.90</b>     | ± <b>0.09</b> | 0.53                            | ± 0.06        |
| Entorhinal (EC)                                            | <b>0.89</b>     | ± <b>0.09</b> | <b>0.86</b>                     | ± <b>0.05</b> |
| Rostral PAG (RPAG)                                         | <b>0.90</b>     | ± <b>0.06</b> | 0.70                            | ± 0.09        |
| Pontine Reticular Formation (PRF)                          | <b>0.88</b>     | ± <b>0.10</b> | 0.76                            | ± 0.12        |
| Dorsolateral Entorhinal (DLECTX)                           | <b>0.97</b>     | ± <b>0.04</b> | 0.66                            | ± 0.05        |
| External Cortex of the Inferior Colliculus (ECIC)          | <b>1.10</b>     | ± <b>0.04</b> | 0.54                            | ± 0.08        |
| Median Raphe (MR)                                          | 0.74            | ± 0.09        | <b>1.34</b>                     | ± <b>0.07</b> |
| Superior Colliculus (SupC)                                 | <b>1.30</b>     | ± <b>0.03</b> | 0.37                            | ± 0.04        |
| Caudal Pontine Reticular Nucleus (CPRt)                    | 0.50            | ± 0.07        | <b>1.12</b>                     | ± <b>0.06</b> |
| Superficial Grey Layer of the Superior Colliculus (SGSupC) | 0.73            | ± 0.09        | 0.27                            | ± 0.11        |
| Caudal PAG (CPAG)                                          | 0.39            | ± 0.03        | 0.61                            | ± 0.05        |
| Locus Coeruleus (LC)                                       | 0.79            | ± 0.05        | <b>1.64</b>                     | ± <b>0.04</b> |
| Dorsal Cortex of the Inferior Colliculus (DCIC)            | <b>1.07</b>     | ± <b>0.05</b> | 0.61                            | ± 0.09        |
| Gigantocellular Reticular Nucleus (GRt)                    | <b>1.18</b>     | ± <b>0.04</b> | <b>0.89</b>                     | ± <b>0.05</b> |
| Medial Vestibular nucleus (MVN)                            | <b>0.94</b>     | ± <b>0.05</b> | 0.53                            | ± 0.04        |
| Superior Cerebellar Peduncle (SupCPed)                     | <b>1.24</b>     | ± <b>0.06</b> | 0.62*                           | ± 0.09        |
| Dorsomedial PAG (DMPAG)                                    | <b>1.02</b>     | ± <b>0.06</b> | <b>0.94</b>                     | ± <b>0.06</b> |
| Medial Geniculate Nucleus (MG)                             | <b>0.84</b>     | ± <b>0.05</b> | 0.52                            | ± 0.05        |
| Paramedian Lobule (PML)                                    | 0.30            | ± 0.03        | <b>1.06*</b>                    | ± <b>0.03</b> |
| Red Nucleus Parvocellular (RNPv)                           | <b>0.93</b>     | ± <b>0.10</b> | 0.34                            | ± 0.05        |
| Red Nucleus Magnocellular (RNMn)                           | 0.35            | ± 0.11        | 0.20*                           | ± 0.02        |
| Deep Cerebellar Nuclei (DCN)                               | 0.33            | ± 0.10        | 0.46                            | ± 0.01        |
| Medial Amygdala (MeA)                                      | 0.84            | ± 0.07        | <b>1.21</b>                     | ± <b>0.07</b> |
| Ventral Posterolateral Nucleus (VPLthal)                   | 0.66            | ± 0.09        | <b>2.20*</b>                    | ± <b>0.03</b> |
| Ventral Posteromedial Nucleus (VPMthal)                    | 0.68            | ± 0.07        | <b>2.05*</b>                    | ± <b>0.03</b> |
| Ventromedial Nucleus (VMthal)                              | <b>1.70</b>     | ± <b>0.04</b> | <b>1.46</b>                     | ± <b>0.04</b> |

Data shown as the mean ± SEM of the VIP statistic as determined through PLSR analysis. Bold denotes significant functional connection with the defined seed region in given experimental group (95% CI VIP>0.80). \*denotes  $P < 0.05$  significant difference in VIP statistic between genotypes (1000 random permutations). Red highlights regions showing increased and blue decreased functional connectivity with the given seed brain region in *Myshkin* (*Myk*/+) mice relative to wild-type (+/+) controls.
