# Supplementary material for: Alternating Hemiplegia of Childhood-Related Neural and Behavioural Phenotypes in Na+,K+-ATPase α3 Missense Mutant Mice
Source: PubMed Central journal article supplement (PMC3603922; doi:10.1371/journal.pone.0060141), 2013-03-20
Supplement: pone.0060141.s009.pdf [file pone.0060141.s009.pdf]

**Supplementary Table 5.** Full data for ventral posteromedial nucleus (VPMthal) functional connectivity.

| Brain Region                                               | Wild-type (+/+) |               | <i>Myshkin</i> ( <i>Myk</i> +/+) |               |
|------------------------------------------------------------|-----------------|---------------|----------------------------------|---------------|
|                                                            | mean            | SEM           | mean                             | SEM           |
| Caudal Motor (CMCTX)                                       | 0.52            | ± 0.05        | 0.51                             | ± 0.03        |
| Rostral Motor (RMCTX)                                      | <b>1.02</b>     | ± <b>0.06</b> | <b>0.26*</b>                     | ± 0.06        |
| Frontal Cortex (FCTX)                                      | <b>0.95</b>     | ± <b>0.09</b> | 0.41                             | ± 0.03        |
| Rostral Ventromedial Striatum (RVMStr)                     | <b>1.00</b>     | ± <b>0.03</b> | <b>0.51*</b>                     | ± 0.05        |
| Rostral Dorsolateral Striatum (RDLStr)                     | <b>0.93</b>     | ± <b>0.04</b> | <b>0.94</b>                      | ± <b>0.03</b> |
| Rostral Dorsomedial Striatum (RDMStr)                      | <b>0.92</b>     | ± <b>0.04</b> | <b>0.98</b>                      | ± <b>0.06</b> |
| Rostral Ventrolateral Striatum (RVLStr)                    | <b>1.02</b>     | ± <b>0.07</b> | <b>1.03</b>                      | ± <b>0.08</b> |
| Caudal Centromedial Striatum (CCMStr)                      | 0.75            | ± 0.05        | 0.79                             | ± 0.06        |
| Caudal Dorsolateral Striatum (CDLStr)                      | 0.52            | ± 0.05        | 0.36                             | ± 0.04        |
| Caudal Dorsomedial Striatum (CDMStr)                       | <b>0.93</b>     | ± <b>0.09</b> | <b>0.29*</b>                     | ± 0.03        |
| Caudal Ventrolateral Striatum (CVLStr)                     | 0.72            | ± 0.07        | 0.61                             | ± 0.05        |
| Globus Pallidus (GP)                                       | 0.73            | ± 0.07        | <b>0.25*</b>                     | ± 0.05        |
| Olivary Body (OB)                                          | <b>1.26</b>     | ± <b>0.14</b> | <b>0.50*</b>                     | ± 0.08        |
| Auditory (AudC)                                            | 0.78            | ± 0.10        | 0.81                             | ± 0.03        |
| Substantia Nigra pars Reticulata (SNR)                     | <b>1.48</b>     | ± <b>0.07</b> | <b>1.06*</b>                     | ± <b>0.12</b> |
| CA3                                                        | <b>1.37</b>     | ± <b>0.09</b> | <b>0.68*</b>                     | ± 0.09        |
| Somatosensory (SSCTX)                                      | <b>0.85</b>     | ± <b>0.05</b> | 0.60                             | ± 0.05        |
| Ventral Anterior Nucleus (VAthal)                          | <b>1.09</b>     | ± <b>0.07</b> | <b>2.12*</b>                     | ± <b>0.04</b> |
| Ventrolateral Nucleus (VLthal)                             | <b>0.92</b>     | ± <b>0.09</b> | <b>1.74</b>                      | ± <b>0.03</b> |
| Dorsolateral Geniculate (DLG)                              | 0.53            | ± 0.12        | <b>1.02</b>                      | ± <b>0.08</b> |
| CA1                                                        | <b>1.04</b>     | ± <b>0.07</b> | 0.51                             | ± 0.05        |
| Entorhinal (EC)                                            | <b>0.84</b>     | ± <b>0.07</b> | 0.64                             | ± 0.06        |
| Rostral PAG (RPAG)                                         | <b>1.74</b>     | ± <b>0.09</b> | <b>0.90</b>                      | ± <b>0.04</b> |
| Pontine Reticular Formation (PRF)                          | <b>1.23</b>     | ± <b>0.12</b> | <b>0.54*</b>                     | ± 0.05        |
| Dorsolateral Entorhinal (DLECTX)                           | <b>1.19</b>     | ± <b>0.12</b> | 0.77                             | ± 0.03        |
| External Cortex of the Inferior Colliculus (ECIC)          | <b>0.96</b>     | ± <b>0.02</b> | <b>0.96</b>                      | ± <b>0.03</b> |
| Median Raphe (MR)                                          | 0.79            | ± 0.06        | <b>1.16</b>                      | ± <b>0.04</b> |
| Superior Colliculus (SupC)                                 | <b>0.87</b>     | ± <b>0.07</b> | 0.65                             | ± 0.05        |
| Caudal Pontine Reticular Nucleus (CPRt)                    | <b>1.12</b>     | ± <b>0.08</b> | <b>0.87</b>                      | ± <b>0.06</b> |
| Superficial Grey Layer of the Superior Colliculus (SGSupC) | 0.66            | ± 0.06        | 0.35                             | ± 0.06        |
| Caudal PAG (CPAG)                                          | 0.55            | ± 0.08        | 0.72                             | ± 0.04        |
| Locus Coeruleus (LC)                                       | <b>1.04</b>     | ± <b>0.08</b> | <b>1.44</b>                      | ± <b>0.02</b> |
| Dorsal Cortex of the Inferior Colliculus (DCIC)            | 0.65            | ± 0.06        | 0.82                             | ± 0.11        |
| Gigantocellular Reticular Nucleus (GRt)                    | <b>1.40</b>     | ± <b>0.13</b> | <b>1.27</b>                      | ± <b>0.02</b> |
| Medial Vestibular nucleus (MVN)                            | <b>0.91</b>     | ± <b>0.05</b> | <b>0.93</b>                      | ± <b>0.02</b> |
| Superior Cerebellar Peduncle (SupCPed)                     | <b>0.88</b>     | ± <b>0.08</b> | <b>1.02</b>                      | ± <b>0.06</b> |
| Dorsomedial PAG (DMPAG)                                    | 0.78            | ± 0.08        | <b>1.08</b>                      | ± <b>0.05</b> |
| Medial Geniculate Nucleus (MG)                             | <b>0.94</b>     | ± <b>0.09</b> | 0.70                             | ± 0.12        |
| Paramedian Lobule (PML)                                    | <b>1.21</b>     | ± <b>0.05</b> | <b>1.16</b>                      | ± <b>0.02</b> |
| Red Nucleus Parvocellular (RNPv)                           | <b>0.88</b>     | ± <b>0.08</b> | <b>0.40*</b>                     | ± 0.05        |
| Red Nucleus Magnocellular (RNMn)                           | 0.46            | ± 0.06        | <b>0.32*</b>                     | ± 0.05        |
| Deep Cerebellar Nuclei (DCN)                               | 0.54            | ± 0.07        | 0.48                             | ± 0.08        |
| Medial Amygdala (MeA)                                      | <b>0.94</b>     | ± <b>0.09</b> | 0.68                             | ± 0.06        |
| Ventral Posterolateral Nucleus (VPLthal)                   | <b>1.20</b>     | ± <b>0.07</b> | <b>2.12</b>                      | ± <b>0.04</b> |
| Ventromedial Thalamic Nucleus (VMthal)                     | <b>0.92</b>     | ± <b>0.07</b> | <b>1.76*</b>                     | ± <b>0.04</b> |

Data shown as the mean ± SEM of the VIP statistic as determined through PLSR analysis. Bold denotes significant functional connection with the defined seed region in given experimental group (95% CI VIP>0.80). \*denotes  $P < 0.05$  significant difference in VIP statistic between genotypes (1000 random permutations). Red highlights regions showing increased and blue decreased functional connectivity with the given seed brain region in *Myshkin* (*Myk*+/+) mice relative to wild-type (+/+) controls.
