# Supplementary material for: Alternating Hemiplegia of Childhood-Related Neural and Behavioural Phenotypes in Na+,K+-ATPase α3 Missense Mutant Mice
Source: PubMed Central journal article supplement (PMC3603922; doi:10.1371/journal.pone.0060141), 2013-03-20
Supplement: pone.0060141.s012.pdf [file pone.0060141.s012.pdf]

**Supplementary Table 8.** Full data for caudal motor cortex (CMCTX) functional connectivity.

| Brain Region                                               | Wild-type (+/+) |   |             | <i>Myshkin</i> ( <i>Myk</i> /+) |   |             |
|------------------------------------------------------------|-----------------|---|-------------|---------------------------------|---|-------------|
|                                                            | mean            | ± | SEM         | mean                            | ± | SEM         |
| Rostral Motor (RMCTX)                                      | 0.71            | ± | 0.10        | <b>1.46</b>                     | ± | <b>0.03</b> |
| Frontal Cortex (FCTX)                                      | <b>0.89</b>     | ± | <b>0.11</b> | 0.52                            | ± | 0.02        |
| Rostral Ventromedial Striatum (RVMStr)                     | 0.56            | ± | 0.11        | 0.73                            | ± | 0.09        |
| Rostral Dorsolateral Striatum (RDLStr)                     | 0.58            | ± | 0.09        | 0.43                            | ± | 0.04        |
| Rostral Dorsomedial Striatum (RDMStr)                      | 0.58            | ± | 0.09        | 0.61                            | ± | 0.08        |
| Rostral Ventrolateral Striatum (RVLStr)                    | 0.48            | ± | 0.14        | 0.53                            | ± | 0.04        |
| Caudal Centromedial Striatum (CCMStr)                      | <b>1.26</b>     | ± | <b>0.07</b> | <b>1.72</b>                     | ± | <b>0.04</b> |
| Caudal Dorsolateral Striatum (CDLStr)                      | <b>1.99</b>     | ± | <b>0.03</b> | <b>2.10</b>                     | ± | <b>0.01</b> |
| Caudal Dorsomedial Striatum (CDMStr)                       | <b>1.39</b>     | ± | <b>0.07</b> | <b>2.15</b>                     | ± | <b>0.02</b> |
| Caudal Ventrolateral Striatum (CVLStr)                     | <b>1.55</b>     | ± | <b>0.03</b> | <b>1.35*</b>                    | ± | <b>0.05</b> |
| Globus Pallidus (GP)                                       | <b>0.75</b>     | ± | <b>0.04</b> | <b>2.07*</b>                    | ± | <b>0.03</b> |
| Olivary Body (OB)                                          | 0.63            | ± | 0.08        | <b>1.00</b>                     | ± | <b>0.05</b> |
| Auditory (AudC)                                            | <b>1.34</b>     | ± | <b>0.05</b> | 0.31*                           | ± | 0.11        |
| Substantia Nigra pars Reticulata (SNR)                     | <b>0.98</b>     | ± | <b>0.06</b> | 0.44*                           | ± | 0.05        |
| CA3                                                        | 0.59            | ± | 0.06        | <b>1.25</b>                     | ± | <b>0.05</b> |
| Somatosensory (SSCTX)                                      | <b>0.92</b>     | ± | <b>0.09</b> | <b>0.91</b>                     | ± | <b>0.06</b> |
| Ventral Anterior Nucleus (VAthal)                          | 0.55            | ± | 0.06        | 0.50                            | ± | 0.08        |
| Ventrolateral Nucleus (VLthal)                             | 0.57            | ± | 0.06        | 0.62                            | ± | 0.08        |
| Dorsolateral Geniculate (DLG)                              | <b>1.35</b>     | ± | <b>0.07</b> | <b>1.70</b>                     | ± | <b>0.06</b> |
| CA1                                                        | <b>1.20</b>     | ± | <b>0.08</b> | <b>0.95</b>                     | ± | <b>0.08</b> |
| Entorhinal (EC)                                            | 0.84            | ± | 0.08        | 0.50                            | ± | 0.13        |
| Rostral Periaqueductal Grey (RPAG)                         | 0.59            | ± | 0.05        | 0.36                            | ± | 0.05        |
| Pontine Reticular Formation (PRF)                          | <b>0.39</b>     | ± | <b>0.04</b> | <b>1.08*</b>                    | ± | <b>0.10</b> |
| Dorsolateral Entorhinal (DLECTX)                           | <b>0.87</b>     | ± | <b>0.08</b> | 0.43                            | ± | 0.02        |
| External Cortex of the Inferior Colliculus (ECIC)          | <b>0.62</b>     | ± | <b>0.09</b> | <b>0.98</b>                     | ± | <b>0.13</b> |
| Median Raphe (MR)                                          | <b>1.75</b>     | ± | <b>0.03</b> | <b>1.10</b>                     | ± | <b>0.08</b> |
| Superior Colliculus (SupC)                                 | <b>0.52</b>     | ± | <b>0.05</b> | <b>1.09*</b>                    | ± | <b>0.08</b> |
| Caudal Pontine Reticular Nucleus (CPRt)                    | <b>1.72</b>     | ± | <b>0.07</b> | 0.39*                           | ± | 0.07        |
| Superficial Grey Layer of the Superior Colliculus (SGSupC) | 0.82            | ± | 0.06        | <b>1.03</b>                     | ± | <b>0.07</b> |
| Caudal PAG (CPAG)                                          | <b>1.11</b>     | ± | <b>0.09</b> | <b>0.93</b>                     | ± | <b>0.12</b> |
| Locus Coeruleus (LC)                                       | <b>1.53</b>     | ± | <b>0.04</b> | 0.48*                           | ± | 0.10        |
| Dorsal Cortex of the Inferior Colliculus (DCIC)            | <b>1.65</b>     | ± | <b>0.03</b> | 0.60                            | ± | 0.11        |
| Gigantocellular Reticular Nucleus (GRt)                    | 0.51            | ± | 0.04        | 0.65                            | ± | 0.06        |
| Medial Vestibular nucleus (MVN)                            | 0.49            | ± | 0.06        | 0.69                            | ± | 0.04        |
| Superior Cerebellar Peduncle (SupCPed)                     | 0.41            | ± | 0.07        | 0.44                            | ± | 0.11        |
| Dorsomedial PAG (DMPAG)                                    | <b>0.86</b>     | ± | <b>0.08</b> | 0.48                            | ± | 0.06        |
| Medial Geniculate Nucleus (MG)                             | 0.38            | ± | 0.03        | 0.70                            | ± | 0.10        |
| Paramedian Lobule (PML)                                    | <b>1.37</b>     | ± | <b>0.11</b> | 0.46*                           | ± | 0.03        |
| Red Nucleus Parvocellular (RNPv)                           | 0.45            | ± | 0.05        | 0.44                            | ± | 0.03        |
| Red Nucleus Magnocellular (RNMn)                           | 0.59            | ± | 0.09        | 0.45                            | ± | 0.07        |
| Deep Cerebellar Nuclei (DCN)                               | <b>1.31</b>     | ± | <b>0.10</b> | <b>1.45</b>                     | ± | <b>0.07</b> |
| Medial Amygdala (MeA)                                      | <b>0.92</b>     | ± | <b>0.10</b> | <b>0.95</b>                     | ± | <b>0.07</b> |
| Ventral Posterolateral Nucleus (VPLthal)                   | 0.35            | ± | 0.09        | 0.44                            | ± | 0.09        |
| Ventral Posteromedial Nucleus (VPMthal)                    | 0.37            | ± | 0.04        | 0.50                            | ± | 0.05        |
| Ventromedial Thalamic Nucleus (VMthal)                     | 0.68            | ± | 0.07        | 0.35                            | ± | 0.06        |

Data shown as the mean ± SEM of the VIP statistic as determined through PLSR analysis. Bold denotes significant functional connection with the defined seed region in given experimental group (95% CI VIP>0.80). \*denotes  $P < 0.05$  significant difference in VIP statistic between genotypes (1000 random permutations). Red highlights regions showing increased and blue decreased functional connectivity with the given seed brain region in *Myshkin* (*Myk*/+) mice relative to wild-type (+/+) controls.
